# Supplementary material
Source: Springer Nature journal article supplement (https://www.springermedizin.de/resource/supplementary/12879_2007_629_MOESM2_ESM.pdf/9449378)

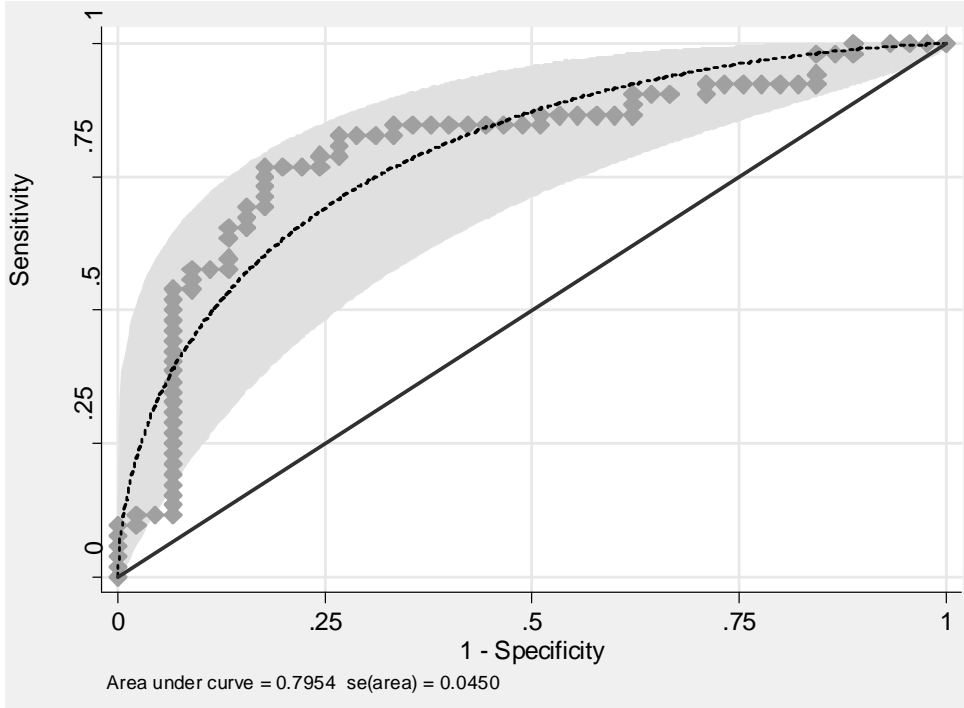

Supplement: MOESM2 [file 9449378]
